# Supplementary material for: In situ site-selective transition metal K-edge XAS: a powerful probe of the transformation of mixed-valence compounds
Source: Royal Society of Chemistry journal article supplement (doi:10.1039/c5cp02591e), 2015-01-01
Supplement: c5cp02591e1.pdf [file c5cp02591e1.pdf]

## In situ site-selective transition metal K-edge XAS: A powerful probe of the transformation of mixed-valence compounds

Amélie Bordage,<sup>\*a</sup> Virgile Trannoy,<sup>a</sup> Olivier Proux,<sup>b</sup> Hugo Vitoux,<sup>c</sup> Robinson Moulin,<sup>a</sup> and Anne Bleuzen<sup>a</sup>

### Supplementary information : X-ray diffraction pattern of the final phase

A Co-PBA sample was calcinated in the laboratory following the XAS measurements with rigorously the same temperature ramps and dwell times at a fixed temperature. Its XRD pattern and the one of a sample prepared following the calcination procedure (2 hours at 800°C) in ref. [A] is presented in the figure below. The peak positions and their relative intensity are in excellent agreement. The difference in absolute intensity arises from a different cristallinity of the samples that originates from the different final heating temperature (800°C for ref. [A] and 400°C at the ESRF). This is an additional proof that the process followed in situ by XAS resulted in the targeted  $\text{Co}_3\text{O}_4$  phase.

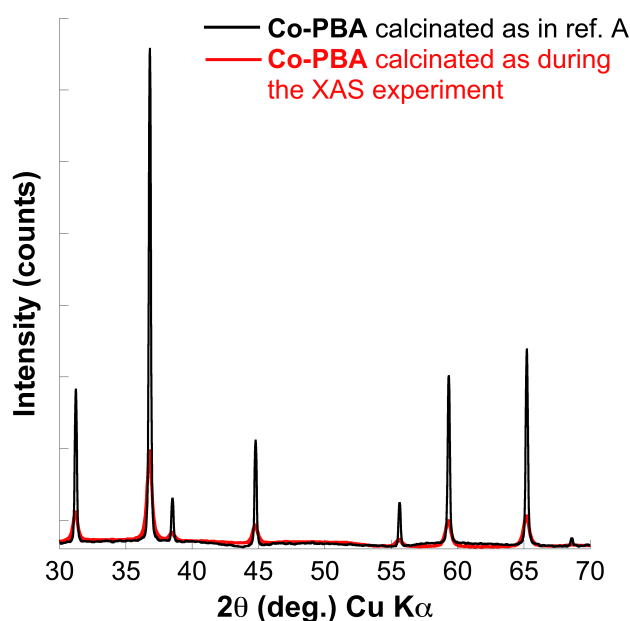

### Reference

[A] V. Trannoy, E. Delahaye, G. Fornasieri, P. Beaunier, A. Bleuzen, *C.R. Chimie*, 2014, **17**, 512-520.
